# Supplementary material for: Monodisperse nickel nanoparticles prepared from a monosurfactant system and their magnetic propertiesElectronic supplementary information (ESI) available: XPS of Ni nanoparticles; plot of magnetization vs. applied field. See http://www.rsc.org/suppdata/jm/b3/b303226d/
Source: Royal Society of Chemistry journal article supplement (doi:10.1039/b303226d), 2003-01-01
Supplement: b303226d.pdf [file b303226d.pdf]

## Supporting materials

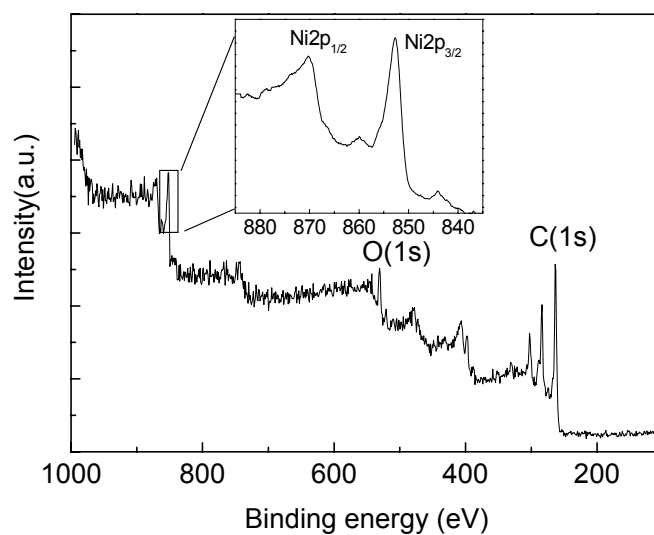

Fig.S1 XPS spectra of Ni nanoparticles. Inset shows the expand spectrum of Ni2p core lines.

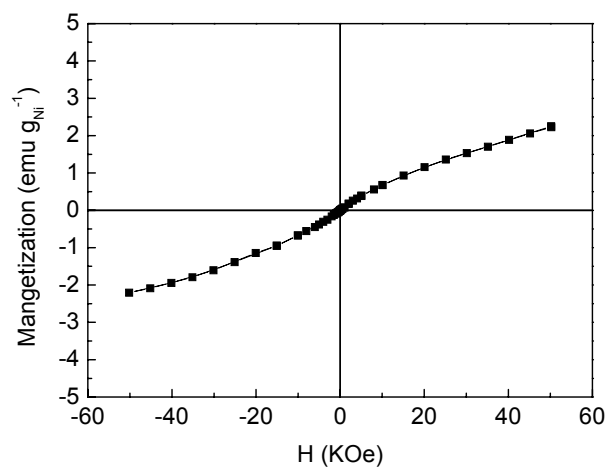

Fig. S2 Magnetization as a function of the applied field measured at 300K.
